# Supplementary material for: Airway secretory cell fate conversion via YAP‐mTORC1‐dependent essential amino acid metabolism
Source: PubMed Central journal article supplement (PMC9016350; doi:10.15252/embj.2021109365), 2022-03-14
Supplement: EMBJ-41-e109365-s005.pdf [file EMBJ-41-e109365-s005.pdf]

## Appendix

### **Airway secretory cell fate conversion via YAP-mTORC1-dependent essential amino acid metabolism**

Hae Yon Jeon<sup>1,8</sup>, Jinwook Choi<sup>2,8</sup>, Lianne Kraaier<sup>2,3</sup>, Young Hoon Kim<sup>1</sup>, David Eisenbarth<sup>1</sup>, Kijong Yi<sup>4,5</sup>, Ju-Gyeong Kang<sup>1</sup>, Jin Woo Kim<sup>1</sup>, Hyo Sup Shim<sup>6</sup>, Joo-Hyeon Lee<sup>2,7,\*</sup>, Dae-Sik Lim<sup>1,\*</sup>

### **Table of Content**

- **Appendix Figure S1. Activation of YAP/TAZ by *Lats1/2* deletion leads to peribronchiolar fibrosis**
- **Appendix Figure S2. Unfiltered single cell RNA sequencing results**

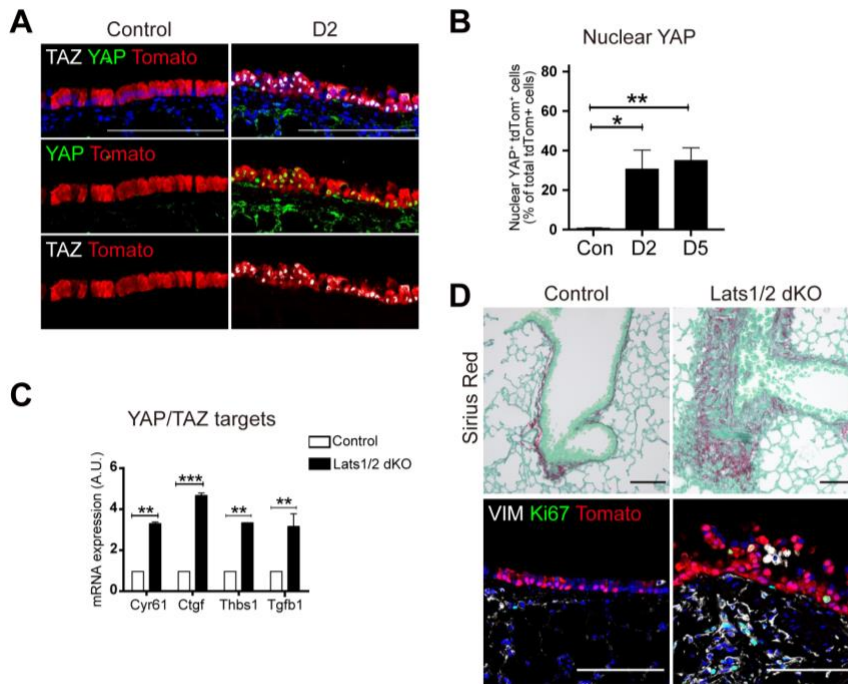

### Appendix Figure S1. Activation of YAP/TAZ by *Lats1/2* deletion leads to peribronchiolar fibrosis

- A** Representative IF images showing the expression of YAP and TAZ in control and *Lats1/2* dKO lungs at day 2 post tamoxifen treatment. Tomato (for secretory lineage, red), TAZ (white), YAP (green), and DAPI (blue). Scale bars, 100 $\mu$ m.
- B** Quantification of nuclear YAP in *Scgbl1* lineage-labeled cells of control and *Lats1/2* dKO lungs at day 2 and 5 post tamoxifen treatment. Data are presented as mean  $\pm$  SEM (n=3, each group). \*p<0.05, \*\*p<0.01.
- C** qPCR analysis of YAP/TAZ target genes (*Cyr61*, *Ctgf*, *Thbs1*, *Tgfb1*) in freshly isolated *Scgbl1* lineage-labeled cells of control and *Lats1/2* dKO lungs at day 2 post tamoxifen treatment. Data are presented as mean  $\pm$  SEM (n=3, each group). \*\*p<0.01, \*\*\*p<0.001.
- D** Representative images of Sirius red staining for collagen (top) and IF images of proliferating mesenchymal cells (bottom) in control and *Lats1/2* dKO lungs at day 7 post tamoxifen treatment. Tomato (for secretory lineage, red), VIM (Vimentin for mesenchyme, white), Ki67 (for proliferating cells, green), and DAPI (blue). Scale bars, 100 $\mu$ m.

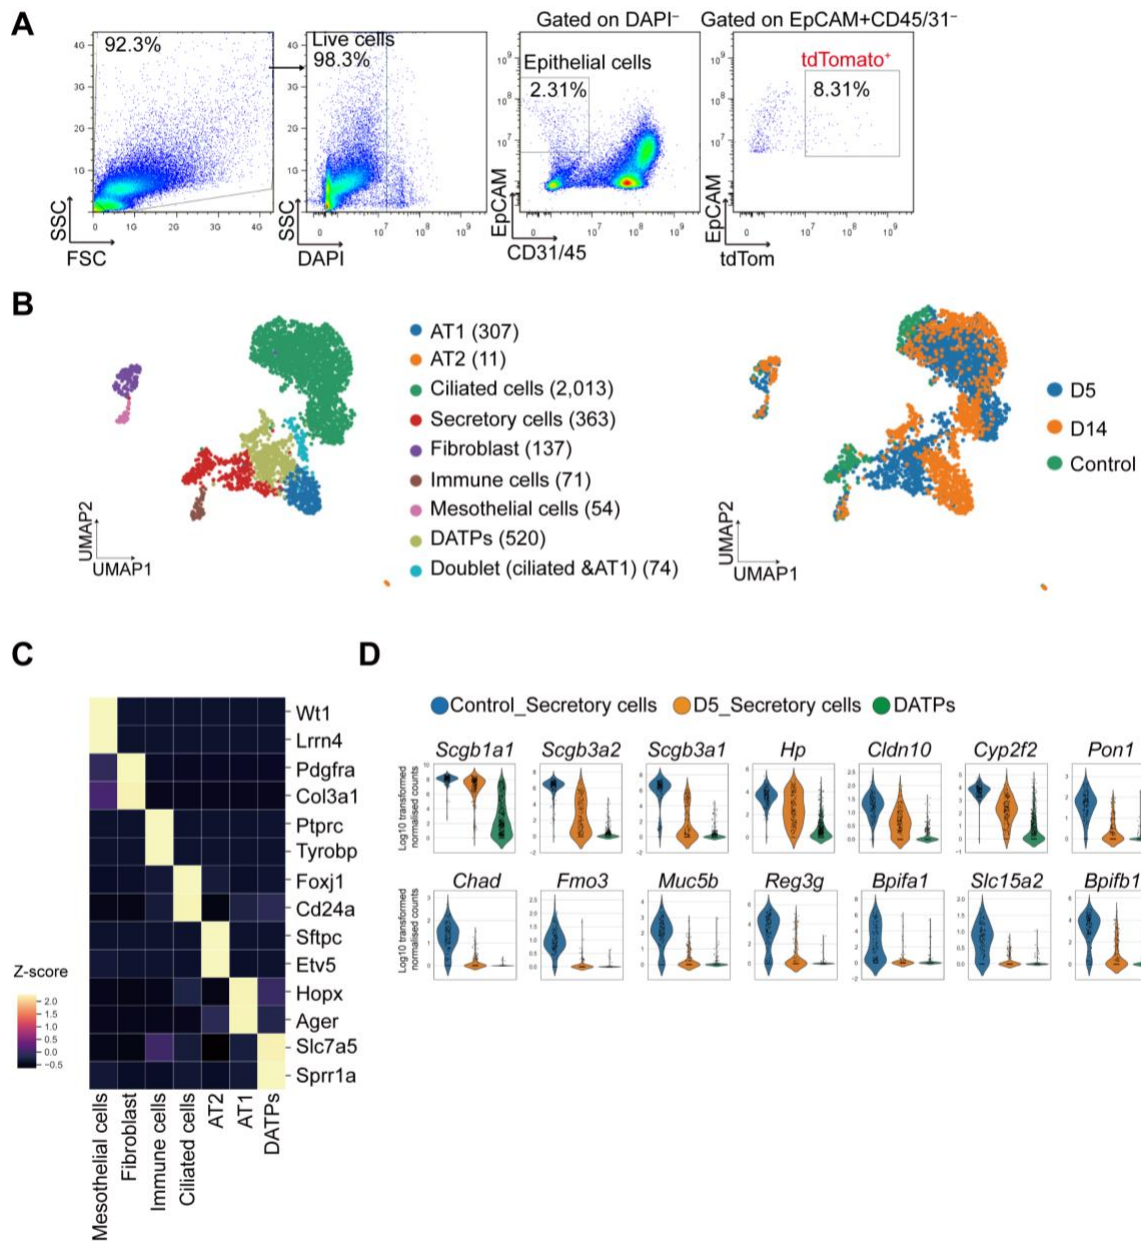

## Appendix Figure S2. Unfiltered single cell RNA sequencing results

- A** Flow cytometry sorting scheme for isolating *Scgb1a1* lineage-labeled tdTomato<sup>+</sup> cells from control lungs at day 5 post tamoxifen treatment and *Lats1/2* dKO lungs at day 5 and 14 post tamoxifen treatment for scRNA-sequencing.
- B** UMAP plot showing unfiltered cell clusters identified in merged single-cell transcriptomes from control and *Lats1/2* dKO lungs at day 5 and 14 post tamoxifen treatment.
- C** Heatmap of representative cell marker genes of each cell cluster.
- D** Violin plot of secretory cell markers in secretory cells and DATP cells of control and *Lats1/2* dKO lungs. Of note, most of the secretory marker genes are dramatically lost in *Lats1/2*-deficient secretory cells at day 5 post tamoxifen induction.
